# Supplementary material for: A bi-stable Pt(ii) based molecular turnstile
Source: Royal Society of Chemistry journal article supplement (doi:10.1039/c5cc04456a), 2015-01-01

## **Electronic Supplementary Informations**

Nicolas Zigon and Mir Wais Hosseini\*

Molecular Tectonics Laboratory (UMR UDS-CNRS 7140)

University of Strasbourg

Institut Le Bel, 4 rue Blaise Pascal, 67000 Strasbourg, France

Tel: +33 3 68 85 13 23

Fax: + 33 3 68 85 13 25

E-mail: [hosseini@unistra.fr](mailto:hosseini@unistra.fr)

## **Experimental section**

### **General procedures**

THF was distilled over Na/benzophenone. NEt<sub>3</sub> was distilled over KOH. CH<sub>2</sub>Cl<sub>2</sub> was distilled over P<sub>2</sub>O<sub>5</sub>. Other analytical solvents were purchased as analytical grade and used without further purification. All commercially available products were used as received without further purification. <sup>1</sup>H-, <sup>13</sup>C-, and <sup>31</sup>P-NMR spectra were recorded at 298 K on either a Bruker AV300, AV400, AV500 or AV600 spectrometers, with the solvent peak as the internal reference. For signals assignment, the chemical shift is given first, followed in brackets by the multiplicity of the signal (br = broad, m = multiplet, s = singulet, d = doublet, t = triplet, virtual t = virtual triplet), the integration, the assignment and the coupling constants). Mass spectrometry was performed by the Service de Spectrométrie de Masse, University of Strasbourg. Elemental analyses were performed by the Service de Microanalyses, University of Strasbourg.

## I – Synthesis

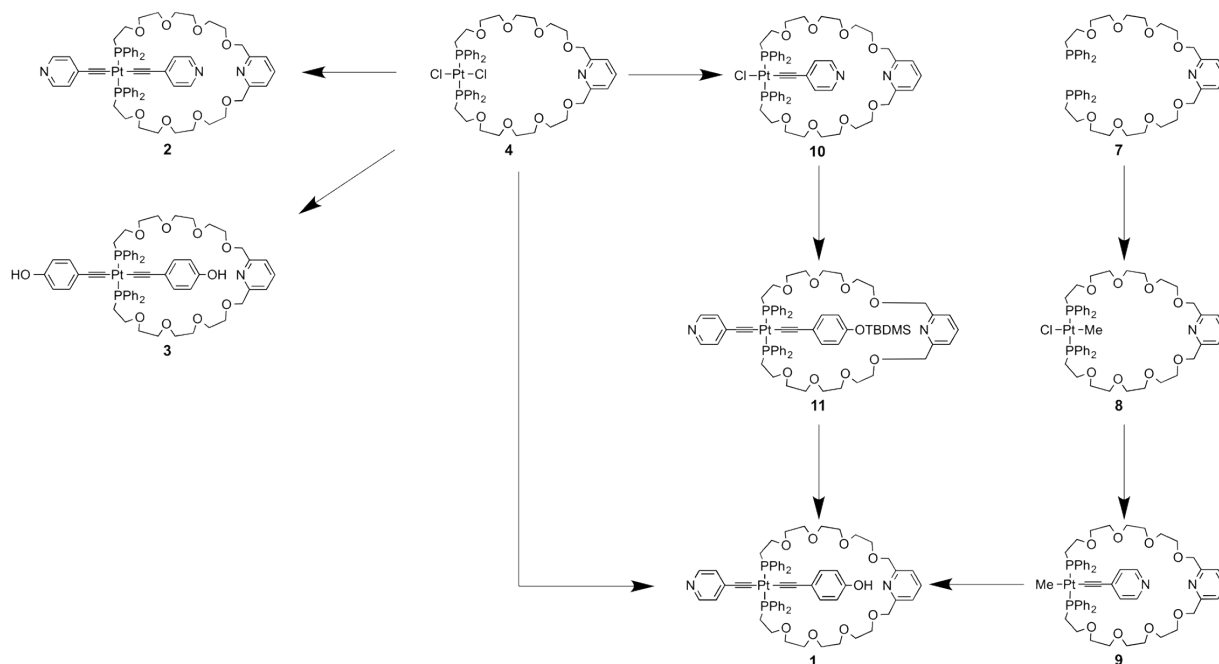

Compounds **2**,<sup>1</sup> **4**,<sup>1</sup> **5**,<sup>2</sup> **6**,<sup>3</sup> **7**,<sup>1</sup> *cis*-Cl<sub>2</sub>Pt(PPh<sub>3</sub>)<sub>2</sub>,<sup>4</sup> CODPtCl<sub>2</sub><sup>5</sup> and CODPtMeCl<sup>6</sup> were synthesized according to literature procedures.

**Compound 8.** Diphosphine **7** (0.46 g, 0.56 mmol, 1 eq.) and CODPtMeCl (196 mg, 0.56 mmol, 1 eq.) were dissolved separately in dry, degassed CH<sub>2</sub>Cl<sub>2</sub> (25 mL each) and added by syringe pump (1 mL/hour) in a dry 1 L three-necked round-bottomed flask containing dry, degassed CH<sub>2</sub>Cl<sub>2</sub> (400 mL). At the end of the addition, the solution is stirred for 1 more day. After removal of the solvent under reduced pressure, the product is purified by column chromatography (SiO<sub>2</sub>, CH<sub>2</sub>Cl<sub>2</sub>/MeOH 97/3 to 90/10) to yield **8** (0.55 g, 92%) as a slightly yellow solid. <sup>1</sup>H-NMR (CD<sub>2</sub>Cl<sub>2</sub>, 300 MHz): δ (ppm) = -0.07 (t, 3H, Pt-CH<sub>3</sub>, <sup>2</sup>J<sub>Pt-H</sub> = 80.5 Hz, <sup>3</sup>J<sub>P-H</sub> = 6.5 Hz), 2.95 (m, 4H, H<sub>l</sub>), 3.46-3.72 (m, 24H, OCH<sub>2</sub>), 3.89 (m, 4H, H<sub>k</sub>), 4.59 (s, 4H, H<sub>d</sub>), 7.32 (d, 2H, H<sub>b</sub>, <sup>3</sup>J = 7.7 Hz), 7.36-7.46 (m, 12H, H<sub>o-p</sub>), 7.62-7.75 (m, 9H, H<sub>a-n</sub>). <sup>13</sup>C-NMR (CD<sub>2</sub>Cl<sub>2</sub>, 125 MHz): δ (ppm) = -12.9 (C<sub>Pt</sub>, <sup>1</sup>J<sub>Pt-C</sub> = 662 Hz, <sup>2</sup>J<sub>P-C</sub> = 5.6 Hz), 27.0 (C<sub>l</sub>, virtual t, J<sub>P-C</sub>

= 16.9 Hz), 67.4 (C<sub>k</sub>), 70.5, 70.6, 70.7, 70.8, 70.9, 71.0, 71.1 (OCH<sub>2</sub>), 74.4 (C<sub>d</sub>), 120.4 (C<sub>b</sub>), 128.5 (C<sub>o</sub>, virtual t, J<sub>P-C</sub> = 4.9 Hz), 130.6 (C<sub>p</sub>), 131.5 (C<sub>m</sub>, virtual t, J<sub>P-C</sub> = 26.2 Hz), 134.0 (C<sub>n</sub>, virtual t, J<sub>P-C</sub> = 6.0 Hz), 137.6 (C<sub>a</sub>), 158.4 (C<sub>c</sub>). <sup>31</sup>P-NMR (CD<sub>2</sub>Cl<sub>2</sub>, 121.5 MHz): δ (ppm) = 18.7 (J<sub>P-Pt</sub> = 3043 Hz). MS (ESI): m/z calcd for C<sub>48</sub>H<sub>62</sub>ClNO<sub>8</sub>P<sub>2</sub>PtNa<sup>+</sup> [M + Na]<sup>+</sup> 1096.318 g.mol<sup>-1</sup>; found 1096.322 g.mol<sup>-1</sup>; m/z calcd for C<sub>48</sub>H<sub>62</sub>NO<sub>8</sub>P<sub>2</sub>Pt<sup>+</sup> [M - Cl]<sup>+</sup> 1038.36 g.mol<sup>-1</sup>; found 1038.37 g.mol<sup>-1</sup>.

**Compound 9.** Compounds **8** (250 mg, 0.233 mmol, 1 eq.) and **5** (36 mg, 0.35 mmol, 1.5 eq.) were dissolved in a degassed THF/NEt<sub>3</sub> mixture (1:1, 30 mL) and the reaction mixture was degassed by freeze-thaw cycles. After one cycle, CuI (4.5 mg, 0.02 mmol, 0.1 eq.) was added in the cold mixture. After 5 more cycles, the reaction mixture was warmed to 50 °C and stirred overnight. After filtration and evaporation of the filtrate, the resulting solid was poured back in CH<sub>2</sub>Cl<sub>2</sub> (50 mL) and washed with 3 x 50 mL of H<sub>2</sub>O. The product was purified by column chromatography (SiO<sub>2</sub>, CHCl<sub>3</sub>/MeOH 97/3 to 90/10) to afford **9** as a yellow solid (0.23 g). This sample contained traces (*ca.* 5 % according to <sup>1</sup>H and <sup>31</sup>P NMR) of the bis-coupled **2** that could not be separated at this stage. <sup>1</sup>H-NMR (CD<sub>2</sub>Cl<sub>2</sub>, 400 MHz): δ (ppm) = -0.26 (t, 3H, Pt-CH<sub>3</sub>, <sup>3</sup>J<sub>P-H</sub> = 6.6 Hz, <sup>2</sup>J<sub>Pt-H</sub> = 53.5 Hz), 3.07 (m, 4H, H<sub>i</sub>), 3.40-3.73 (m, 24H, OCH<sub>2</sub>), 3.88 (m, 4H, H<sub>k</sub>), 4.61 (s, 4H, H<sub>d</sub>), 7.38-7.48 (m, 14H, H<sub>b-o-p</sub>), 7.65-7.75 (m, 9H, H<sub>a-n</sub>). <sup>31</sup>P-NMR (CD<sub>2</sub>Cl<sub>2</sub>, 162 MHz): δ (ppm) = 13.0 (J<sub>P-Pt</sub> = 2855 Hz). MS (ESI): m/z calcd for C<sub>61</sub>H<sub>67</sub>N<sub>3</sub>O<sub>8</sub>P<sub>2</sub>PtNa<sup>+</sup> [**2** + Na]<sup>+</sup> 1249.395 g.mol<sup>-1</sup>; found 1249.389 g.mol<sup>-1</sup>; m/z calcd for C<sub>55</sub>H<sub>66</sub>N<sub>2</sub>O<sub>8</sub>P<sub>2</sub>PtNa<sup>+</sup> [M + Na]<sup>+</sup> 1162.384 g.mol<sup>-1</sup>; found 1162.380 g.mol<sup>-1</sup>; m/z calcd for C<sub>55</sub>H<sub>67</sub>N<sub>2</sub>O<sub>8</sub>P<sub>2</sub>Pt<sup>+</sup> [M + H]<sup>+</sup> 1140.402 g.mol<sup>-1</sup>; found 1140.399 g.mol<sup>-1</sup>.

**Compound 10.** In a schlenk flask, ethynylpyridyl **5** (41.2 mg, 0.40 mmol, 1 eq.) was dissolved in THF (20 mL) and the solution was degassed by freeze-pump-thaw cycles and placed at -78°C,

and *n*BuLi (1.6 M in hexanes, 0.25 mL, 0.40 mmol, 1 eq.) was added. After 30 min., SnMe<sub>3</sub>Cl (119 mg, 0.60 mmol, 1.5 eq.) was added and the solution was slowly heated to -20 °C. After 1 h 30, complex **4** (0.44 g, 0.40 mmol, 1 eq.) and CuI (3 mg, 16 μmol, 4 %) were added and the solution was slowly heated to 60 °C. After 18 h, the solution was allowed to reach RT and the solvents were removed. Column chromatography (SiO<sub>2</sub>, CHCl<sub>3</sub>/MeOH 0 to 10 %) afforded **10** as a yellow solid (0.16 g, 34 %). <sup>1</sup>H-NMR (CDCl<sub>3</sub>, 500 MHz): δ (ppm) = 3.01 (m, 4H, H<sub>l</sub>), 3.42-3.72 (m, 24H, OCH<sub>2</sub>), 3.81 (m, 4H, H<sub>k</sub>), 4.64 (s, 4H, H<sub>d</sub>), 6.28 (br, 2H, H<sub>t</sub>), 7.28-7.46 (m, 14H, H<sub>b-o-p</sub>), 7.66 (t, 1H, <sup>3</sup>J = 7.6 Hz), 7.68-7.77 (m, 8H, H<sub>n</sub>), 8.14 (br, 2H, H<sub>u</sub>). <sup>13</sup>C-NMR HSQC/HMBC (CDCl<sub>3</sub>, 125 MHz): δ (ppm) = 26.4 (C<sub>l</sub>, virtual t, J<sub>P-C</sub> = 17.7 Hz), 66.8 (C<sub>k</sub>), 70.4, 70.4, 70.7, 70.8, 70.9, 71.1, 74.2 (C<sub>d</sub>), 120.2 (H<sub>b</sub>), 125.6 (H<sub>t</sub>), 128.5 (H<sub>o</sub>, virtual t, J<sub>P-C</sub> = 5.2 Hz), 130.9 (H<sub>p</sub>), 130.3 (H<sub>m</sub>, virtual t, J<sub>P-C</sub> = 27.8 Hz), 133.8 (H<sub>n</sub>, virtual t, J<sub>P-C</sub> = 5.9 Hz), 137.6 (H<sub>a</sub>), 148.5 (H<sub>u</sub>), 158.1 (H<sub>c</sub>). <sup>31</sup>P-NMR (CDCl<sub>3</sub>, 121.5 MHz): δ (ppm) = 10.3 (J<sub>P-Pt</sub> = 2529 Hz). MS (ESI): *m/z* calcd for C<sub>54</sub>H<sub>64</sub>ClN<sub>2</sub>O<sub>8</sub>P<sub>2</sub>Pt<sup>+</sup> [M + H]<sup>+</sup> 1161.3472 g.mol<sup>-1</sup> ; found 1161.3675 g.mol<sup>-1</sup>.

**Compound 11.** In a schlenk flask, compounds **10** (0.16 g, 0.14 mmol, 1 eq.) and **6** (48 mg, 0.21 mmol, 1.5 eq.) were dissolved in THF (20 mL) and NEt<sub>3</sub> (5 mL) and the solution was degassed by freeze-pump-thaw cycles. After heating at 60 °C overnight, the solution was evaporated to dryness. Column chromatography (SiO<sub>2</sub>, CHCl<sub>3</sub>/MeOH 2 to 10 %) afforded **11** as a yellow solid (0.17 g, 91 %). <sup>1</sup>H-NMR (CD<sub>2</sub>Cl<sub>2</sub>, 300 MHz): δ (ppm) = 0.12 (s, 6H, H<sub>Si-Me</sub>), 0.93 (s, 9H, H<sub>Si-*t*Bu</sub>), 3.15 (m, 4H, H<sub>l</sub>), 3.39-3.71 (m, 24H, OCH<sub>2</sub>), 3.92 (m, 4H, H<sub>k</sub>), 4.59 (s, 4H, H<sub>d</sub>), 6.51 (d, 2H, H<sub>t</sub>, <sup>3</sup>J = 8.7 Hz), 6.55 (eclipsed by H<sub>t</sub> and H<sub>u</sub> signals, 2H, H<sub>T</sub>), 6.58 (d, 2H, H<sub>u</sub>, <sup>3</sup>J = 8.7 Hz), 7.31 (d, 2H, H<sub>b</sub>, <sup>3</sup>J = 7.7 Hz), 7.36-7.48 (m, 12H, H<sub>o-p</sub>), 7.63 (t, 1H, H<sub>a</sub>, <sup>3</sup>J = 7.7 Hz), 7.76-7.88 (m, 8H, H<sub>n</sub>), 8.18 (d, 2H, H<sub>U</sub>, <sup>3</sup>J = 5.2 Hz). <sup>13</sup>C-NMR (CD<sub>2</sub>Cl<sub>2</sub>, 125 MHz): δ (ppm) = -4.4 (Si-CH<sub>3</sub>), 18.4 (Si-C), 25.8 (Si-C-CH<sub>3</sub>), 28.7 (C<sub>l</sub>, virtual t, J<sub>P-C</sub> = 18.7 Hz), 67.4 (C<sub>k</sub>), 70.5,

70.6, 70.7, 70.9, 71.1, 74.3 ( $C_d$ ), 108.8, 111.5, 119.8 ( $C_{b \text{ or } t}$ ), 120.4 ( $C_{b \text{ or } t}$ ), 121.7, 125.2, 127.2 ( $C_T$ ), 128.5 ( $C_o$ , virtual t,  $J_{P-C} = 4.9$  Hz), 130.9 ( $C_p$ ), 131.9 ( $C_m$ , virtual t,  $J_{P-C} = 28.4$  Hz), 133.8 ( $C_u$ ), 134.0 ( $C_n$ , virtual t,  $J_{P-C} = 5.9$  Hz), 136.4, 137.5 ( $C_a$ ), 149.2 ( $C_U$ ), 153.9 ( $C_v$ ), 158.3 ( $C_c$ ).  $^{31}\text{P}$ -NMR ( $\text{CD}_2\text{Cl}_2$ , 121.5 MHz):  $\delta$  (ppm) = 6.3 ( $J_{P-Pt} = 2531$  Hz). MS (ESI):  $m/z$  calcd for  $\text{C}_{68}\text{H}_{83}\text{N}_2\text{O}_9\text{P}_2\text{PtSi}^+ [\text{M} + \text{H}]^+$  1357.4991  $\text{g}\cdot\text{mol}^{-1}$ ; found 1357.4816  $\text{g}\cdot\text{mol}^{-1}$ .

**Compound 3.** *Method A:* In a dry flask, **4** (36 mg, 33  $\mu\text{mol}$ , 1 eq.), **5** (22.8 mg, 0.12 mmol, 3.6 eq.) and CuI (2 mg, 0.01 mmol, 0.3 eq.) were dissolved in  $\text{CH}_2\text{Cl}_2$  (2 mL) and the solution was degassed by thaw-freeze cycles. After one cycle, TBAF (1M/THF, 0.23 mL, 0.23 mmol, 7 eq.) was added to the cold mixture. After 5 more cycles, the mixture was stirred at RT for 20 h. After filtration and removal of the solvents, the crude product was purified by column chromatography ( $\text{SiO}_2$ ,  $\text{CH}_2\text{Cl}_2/\text{MeOH}$ , 99/1 to 95/5) and PLC ( $\text{SiO}_2$ ,  $\text{CH}_2\text{Cl}_2/\text{MeOH}$ , 95/5) to afford **3** (4 mg, 10 %). *Method B:* In a dry flask, **4** (110 mg, 0.10 mmol, 1 eq.) and **6** (70 mg, 0.30 mmol, 3 eq.) were dissolved in THF/ $\text{NEt}_3$  (1/1, 10 mL) and the reaction mixture was degassed by freeze-thaw cycles. After one cycle, CuI (2 mg, 0.01 mmol, 0.1 eq.) was added to the cold mixture. After 5 more cycles, the reaction mixture was warmed slowly to 55  $^\circ\text{C}$  and stirred overnight. The mixture was filtrated and the residue washed thoroughly with  $\text{CH}_2\text{Cl}_2$ . After evaporation of the solvent, the resulting solid was poured back in  $\text{CH}_2\text{Cl}_2$  (20 mL) and washed with 4 x 25 mL of  $\text{H}_2\text{O}$ . After evaporation of the solvent, the product was purified by column chromatography ( $\text{SiO}_2$ ,  $\text{CHCl}_3/\text{MeOH}$  100/0 to 90/10) to obtain a mixture of two products (yellow solid, 140 mg). These compounds were poured back in THF/ $\text{CH}_2\text{Cl}_2$  (1/1, 20 mL) and TBAF (1M/THF, 0.3 mL) was added. After 1 h. at RT, the solution was evaporated to dryness and the product was purified by column chromatography ( $\text{SiO}_2$ ,  $\text{CH}_2\text{Cl}_2/\text{MeOH}$ , 95/5) and PLC ( $\text{SiO}_2$ ,  $\text{CH}_2\text{Cl}_2/\text{MeOH}$ , 95/5) to afford **3** as a yellow solid (10 mg, 8 %).  $^1\text{H}$ -NMR ( $\text{CD}_2\text{Cl}_2$ , 600 MHz):  $\delta$  (ppm) = 3.14 (br, 4H,

H<sub>l</sub>), 3.33-3.38 (m, 12H, H<sub>h-i-j</sub>), 3.40 (m, 4H, H<sub>g</sub>), 3.54 (m, 4H, H<sub>f</sub>), 3.66 (m, 4H, H<sub>e</sub>), 4.65 (s, 4H, H<sub>d</sub>), 6.51 (d, 4H, H<sub>u</sub>, <sup>3</sup>J = 8.4 Hz), 6.60 (d, 4H, H<sub>t</sub>, <sup>3</sup>J = 8.4 Hz), 7.37 (d, 2H, H<sub>b</sub>, <sup>3</sup>J = 7.6 Hz), 7.39-7.47 (m, 12H, H<sub>o-p</sub>), 7.76 (t, 1H, H<sub>a</sub>, <sup>3</sup>J = 7.6 Hz), 7.86 (m, 8H, H<sub>n</sub>). <sup>13</sup>C-NMR HSQC/HMBC (CD<sub>2</sub>Cl<sub>2</sub>, 150 MHz): δ (ppm) = 28.8 (C<sub>l</sub>, virtual t, J<sub>P-C</sub> = 18.8 Hz), 67.3 (C<sub>k</sub>), 70.5, 70.7, 70.9, 71.0, 73.7 (C<sub>d</sub>), 104.1 (H<sub>q</sub>), 110.9 (H<sub>r</sub>), 115.3 (H<sub>u</sub>), 120.8 (H<sub>s</sub>), 121.5 (H<sub>b</sub>), 128.5 (H<sub>o</sub>, virtual t, J<sub>P-C</sub> = 5.1 Hz), 130.7 (H<sub>p</sub>), 132.3 (H<sub>m</sub>, virtual t, J<sub>P-C</sub> = 27.8 Hz), 132.4 (H<sub>t</sub>), 134.1 (H<sub>n</sub>, virtual t, J<sub>P-C</sub> = 6.1 Hz), 138.4 (H<sub>a</sub>), 154.8 (H<sub>v</sub>), 158.1 (H<sub>c</sub>). <sup>31</sup>P-NMR (CDCl<sub>3</sub>, 162 MHz): δ (ppm) = 5.07 (J<sub>P-Pt</sub> = 2568 Hz). MS (ESI): m/z calcd for C<sub>65</sub>H<sub>72</sub>N<sub>2</sub>O<sub>10</sub>P<sub>2</sub>Pt<sup>+</sup> [M + Na + CH<sub>3</sub>CN]<sup>+</sup> 1320.42 g.mol<sup>-1</sup>; found 1320.43 g.mol<sup>-1</sup>; m/z calcd for C<sub>63</sub>H<sub>69</sub>NO<sub>10</sub>P<sub>2</sub>PtNa<sup>+</sup> [M + Na]<sup>+</sup> 1279.40 g.mol<sup>-1</sup>; found 1279.40 g.mol<sup>-1</sup>; m/z calcd for C<sub>63</sub>H<sub>70</sub>NO<sub>10</sub>P<sub>2</sub>Pt<sup>+</sup> [M + H]<sup>+</sup> 1257.41 g.mol<sup>-1</sup>; found 1257.42 g.mol<sup>-1</sup>; m/z calcd for C<sub>57</sub>H<sub>67</sub>N<sub>2</sub>O<sub>9</sub>P<sub>2</sub>Pt<sup>+</sup> [M - PhOH + CH<sub>3</sub>CN]<sup>+</sup> 1180.40 g.mol<sup>-1</sup>; found 1180.40 g.mol<sup>-1</sup>.

**Compound 1.** *Method A:* In a dry flask, **4** (100 mg, 91.4 μmol, 1 eq.), **5** (14.1 mg, 0.137 mmol, 1.5 eq.) and **6** (31.9 mg, 0.137 mmol, 1.5 eq.) were dissolved in THF/NEt<sub>3</sub> (1/1, 20 mL) and the reaction mixture was degassed by freeze-thaw cycles. After one cycle, CuI (2 mg, 0.01 mmol, 0.11 eq.) was added to the cold mixture. After 5 more cycles, the reaction mixture was warmed slowly to 55 °C and stirred overnight. The mixture was filtrated and the residue washed thoroughly with CH<sub>2</sub>Cl<sub>2</sub>. After evaporation of the solvent, the resulting solid was poured back in CH<sub>2</sub>Cl<sub>2</sub> (20 mL) and washed with 4 x 25 mL of H<sub>2</sub>O. After evaporation of the solvent, the mixture of intermediates (bis-pyridine, bis-phenol and the heteroleptic complex) was purified by column chromatography (SiO<sub>2</sub>, CHCl<sub>3</sub>/MeOH 100/0 to 95/5). Attempts to separate this mixture (column chromatography, PLC, recrystallization) were unsuccessful and it was used as a mixture in the next step. The mixture (90 mg) was dissolved in degassed THF (3 mL) and TBAF (1M in

THF, 0.13 mL) was added. After 2 h at RT, the solvent was removed in vacuum. After column chromatography (SiO<sub>2</sub>, CHCl<sub>3</sub>/MeOH 98/2) and several PLC (SiO<sub>2</sub>, CHCl<sub>3</sub>/MeOH 90/10), the desired product was obtained (4 mg, 3.5 %). *Method B:* **9** (0.23 g, 0.20 mmol, 1 eq.) was dissolved in CH<sub>2</sub>Cl<sub>2</sub> (20 mL) and HCl (0.1N in MeOH/H<sub>2</sub>O 1000/8, 8.0 mL, 4 eq.) was added. After 20 h at RT, the solvent were removed and the product was dissolved in CH<sub>2</sub>Cl<sub>2</sub> (20 mL), washed with 3 x 30 mL H<sub>2</sub>O and the organic phases were evaporated to dryness. At this stage, several column chromatography (SiO<sub>2</sub>, CHCl<sub>3</sub>/MeOH) could not separate the different products obtained, and it was used as such in the following step. It is noteworthy that the characteristic signals of Pt-CH<sub>3</sub> from the starting material **9** were not present anymore on the <sup>1</sup>H-NMR spectra. In a dry flask, the mixture of products (0.21 g) and **6** (50 mg, 0.22 mmol) were dissolved in THF/NEt<sub>3</sub> (20 + 15 mL) and the reaction mixture was degassed by freeze-thaw cycles. After one cycle, CuI (2 mg, 0.01 mmol, 0.11 eq.) was added to the cold mixture. After 5 more cycles, the reaction mixture was warmed slowly to 60 °C and stirred overnight. The mixture was filtrated and the residue washed thoroughly with CH<sub>2</sub>Cl<sub>2</sub>. The silylated intermediate was partially purified by several column chromatography (SiO<sub>2</sub>, CHCl<sub>3</sub>/MeOH, CH<sub>2</sub>Cl<sub>2</sub>/MeOH, CH<sub>2</sub>Cl<sub>2</sub>/MeOH/NH<sub>3</sub>) and PLC (SiO<sub>2</sub>, CHCl<sub>3</sub>/MeOH). The mixture (22 mg) was dissolved in degassed THF (6 mL) and TBAF (1M in THF, 40 µL) was added. After 1 h at RT, the solvent was removed. Column chromatography (SiO<sub>2</sub>, CHCl<sub>3</sub>/MeOH 100/0 to 90/10) and PLC (SiO<sub>2</sub>, CHCl<sub>3</sub>/MeOH 97/3) afforded **1** (15 mg, 6 %). *Method C:* Compound **11** (120 mg, 88 µmol, 1 eq.) was dissolved in THF (40 mL) and TBAF (1 M/THF, 0.15 mL, 0.15 mmol, 1.7 eq.) was added. After 2 h, the mixture was evaporated to dryness, the resulting solid was poured back in CH<sub>2</sub>Cl<sub>2</sub> (25 mL) and washed with H<sub>2</sub>O (3 x 20 mL). Column chromatography (SiO<sub>2</sub>, CHCl<sub>3</sub>/MeOH 2 to 10 %) yielded impure **1** (110 mg). Out of this mixture, 43 mg were purified by PLC (SiO<sub>2</sub>, CHCl<sub>3</sub>/MeOH 3 %)

to afford **1** (18 mg, 42 %). <sup>1</sup>H-NMR (CD<sub>2</sub>Cl<sub>2</sub>, 300 MHz): δ (ppm) = 3.16 (m, 4H, H<sub>l</sub>), 3.33-3.39 (m, 12H, H<sub>j</sub> + OCH<sub>2</sub>), 3.41 (OCH<sub>2</sub>), 3.55 (H<sub>f</sub>), 3.66 (H<sub>e</sub>), 3.81 (m, 4H, H<sub>k</sub>), 4.64 (s, 4H, H<sub>d</sub>), 6.23 (d, 2H, H<sub>T</sub>, <sup>3</sup>J = 5.8 Hz), 6.62 (d, 2H, H<sub>t</sub>, <sup>3</sup>J = 8.7 Hz), 6.95 (d, 2H, H<sub>u</sub>, <sup>3</sup>J = 8.7 Hz), 7.37 (d, 2H, H<sub>b</sub>, <sup>3</sup>J = 7.8 Hz), 7.40-7.49 (m, 12H, H<sub>o-p</sub>), 7.75 (t, 1H, H<sub>a</sub>, <sup>3</sup>J = 7.8 Hz), 7.78-7.85 (m, 8H, H<sub>n</sub>), 8.09 (d, 2H, H<sub>U</sub>, <sup>3</sup>J = 5.8 Hz). <sup>13</sup>C-NMR HSQC/HMBC (CD<sub>2</sub>Cl<sub>2</sub>, 125 MHz): δ (ppm) = 28.6 (C<sub>l</sub>, virtual t, J<sub>P-C</sub> = 18.6 Hz), 67.2 (C<sub>k</sub>), 70.5, 70.6, 70.6, 70.8, 70.9 (OCH<sub>2</sub>), 73.7 (C<sub>d</sub>), 110.1 (C<sub>r</sub> or s), 110.6 (C<sub>R</sub> or s), 115.7 (C<sub>t</sub>), 119.7 (C<sub>r</sub> or s), 121.4 (C<sub>b</sub>), 125.3 (C<sub>T</sub>), 128.5 (C<sub>o</sub>, virtual t, J<sub>P-C</sub> = 5.1 Hz), 130.9 (C<sub>p</sub>), 131.8 (C<sub>m</sub>, virtual t, J<sub>P-C</sub> = 28.4 Hz), 132.6 (C<sub>u</sub>), 134.0 (C<sub>n</sub>, virtual t, J<sub>P-C</sub> = 6.0 Hz), 136.4 (C<sub>R</sub> or s), 138.4 (C<sub>a</sub>), 149.0 (C<sub>U</sub>), 155.8 (C<sub>V</sub>), 158.0 (C<sub>c</sub>). <sup>31</sup>P-NMR (CD<sub>2</sub>Cl<sub>2</sub>, 162 MHz): δ (ppm) = 5.37 (J<sub>P-Pt</sub> = 2534 Hz). MS (ESI): m/z calcd for C<sub>62</sub>H<sub>69</sub>N<sub>2</sub>O<sub>9</sub>P<sub>2</sub>Pt<sup>+</sup> [M + H]<sup>+</sup> 1242.413 g.mol<sup>-1</sup>; found 1242.418 g.mol<sup>-1</sup>.

1. Zigon, N.; Guenet, A.; Graf, E.; Hosseini, M. W. *Chem. Commun.* **2013**, 49, 3637.
2. Yu, L.; Lindsey, J. S. *J. Org. Chem.* **2001**, 66, 7402.
3. Fang, G. Y.; Aggarwal, V. K. *Angew. Chem. Int. Ed.* **2007**, 46, 359; Ogawa, T.; Ohta, K.; Iijima, T.; Suzuki, T.; Ohta, S.; Endo, Y. *Bioorg. Med. Chem.* **2009**, 17, 1109; Chitneni, S. K.; Deroose, C. M.; Balzarini, J.; Gijsbers, R.; Celen, S.; Debyser, Z.; Mortelmans, L.; Verbruggen, A. M.; Bormans, G. M. *J. Med. Chem.* **2007**, 50, 6627.
4. Pryadun, R.; Sukumaran, D.; Bogadi, R.; Atwood, J. D. *J. Am. Chem. Soc.* **2004**, 126, 12414.
5. van Holst, M.; Le Pevelen, D.; Aldrich-Wright, J. *Eur. J. Inorg. Chem.* **2008**, 2008, 4608.
6. Dekker, G. P. C. M.; Buijs, A.; Elsevier, C. J.; Vrieze, K.; Van Leeuwen, P. W. N. M.; Smeets, W. J. J.; Spek, A. L.; Wang, Y. F.; Stam, C. H. *Organometallics* **1992**, 11, 1937.



$^{31}\text{P}$ -NMR ( $\text{CD}_2\text{Cl}_2$ , 298 K, 162 MHz)

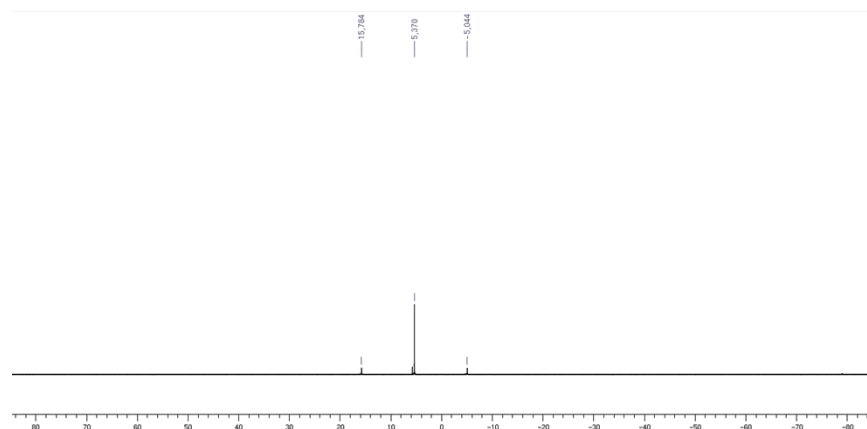

ESI MS

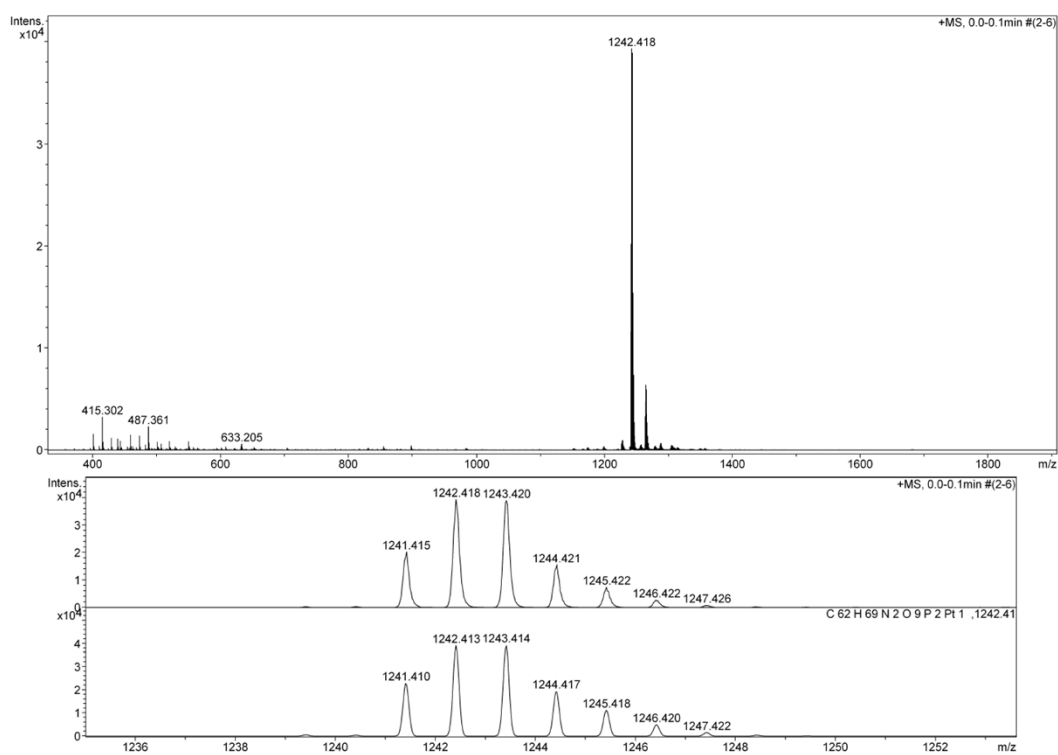

## Compound 3

### $^1\text{H-NMR}$ ( $\text{CD}_2\text{Cl}_2$ , 298 K, 500 MHz)

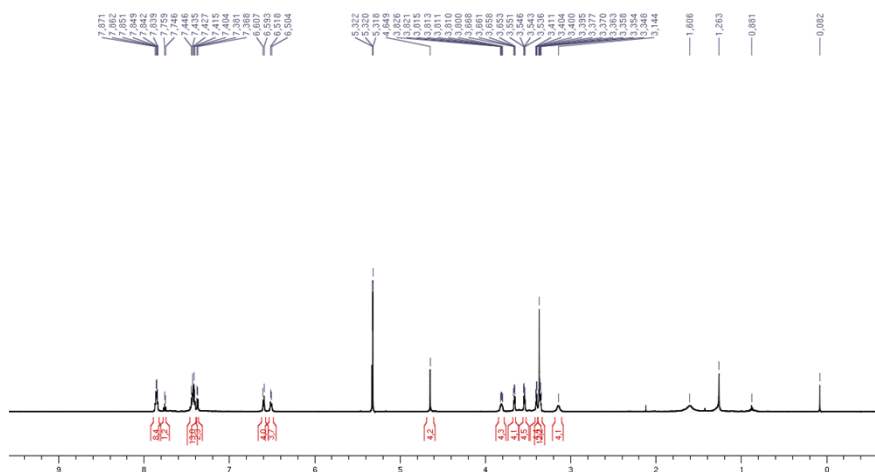

$^{31}\text{P}$ -NMR ( $\text{CDCl}_3$ , 298 K, 162 MHz)

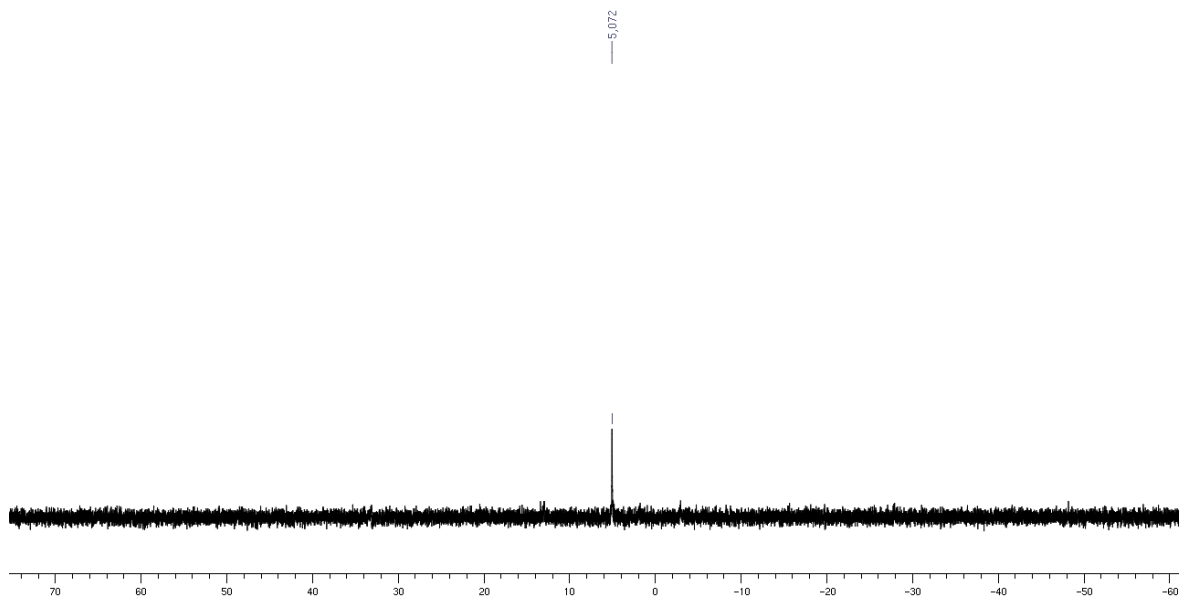

ESI MS

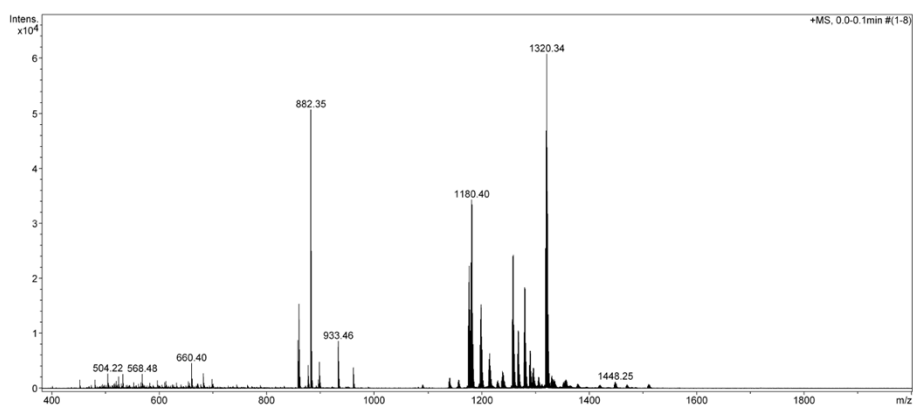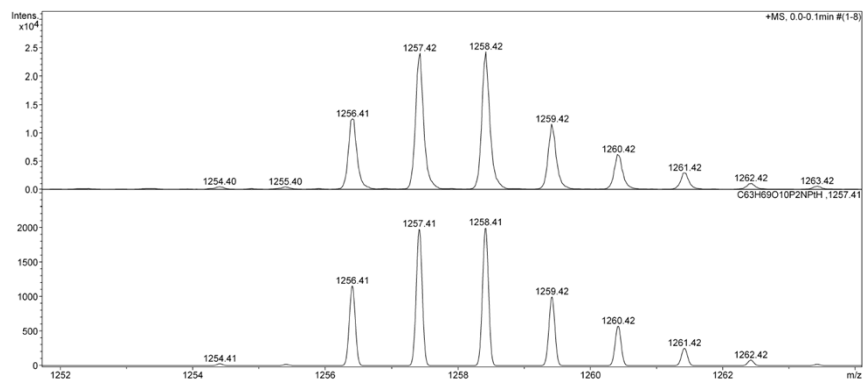

## Compound 10

$^1\text{H}$ -NMR ( $\text{CDCl}_3$ , 298 K, 500 MHz)

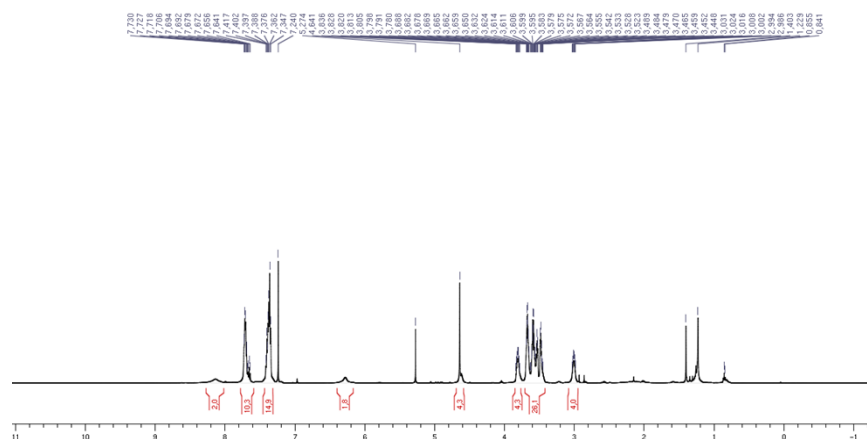

$^{31}\text{P}$ -NMR ( $\text{CDCl}_3$ , 298 K, 121.5 MHz)

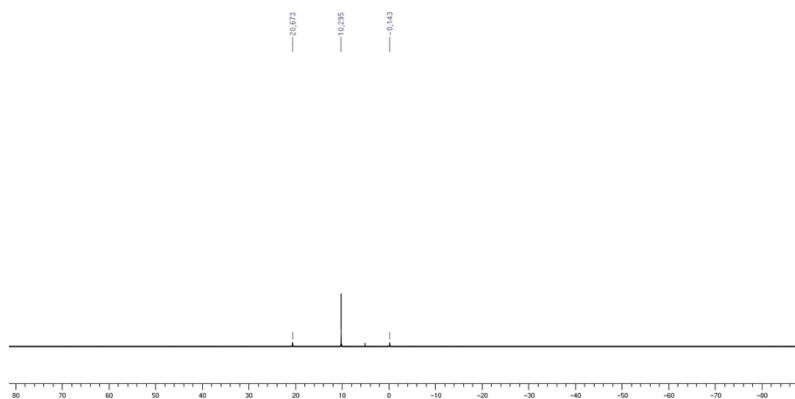

ESI MS

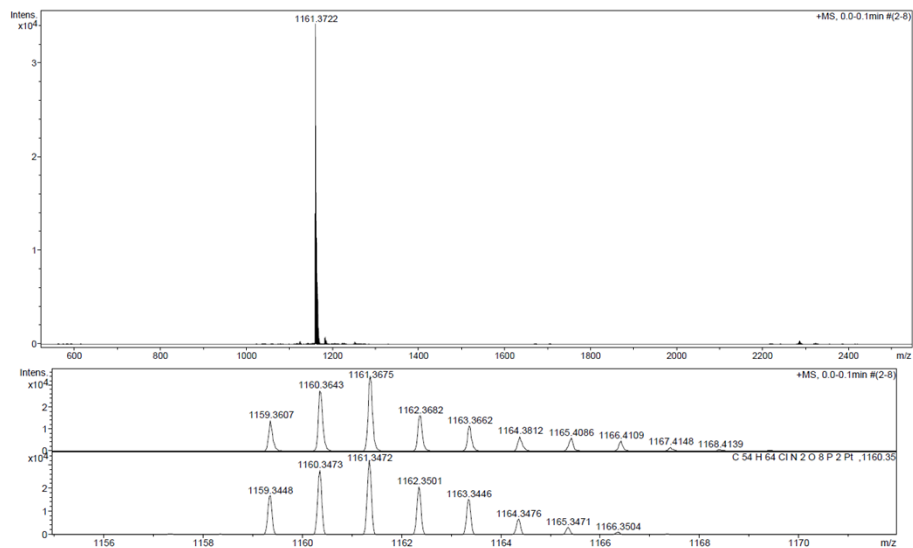

## Compound 8

$^1\text{H}$ -NMR ( $\text{CDCl}_3$ , 298 K, 500 MHz)

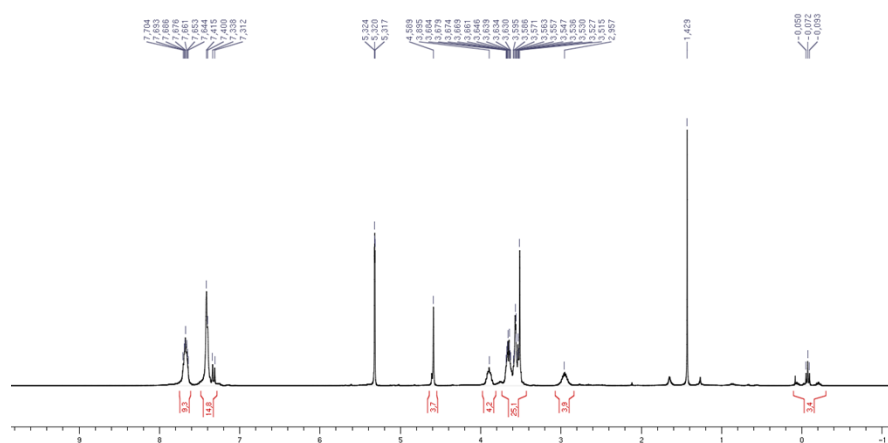

$^{13}\text{C}$ -NMR ( $\text{CDCl}_3$ , 298 K, 125 MHz)

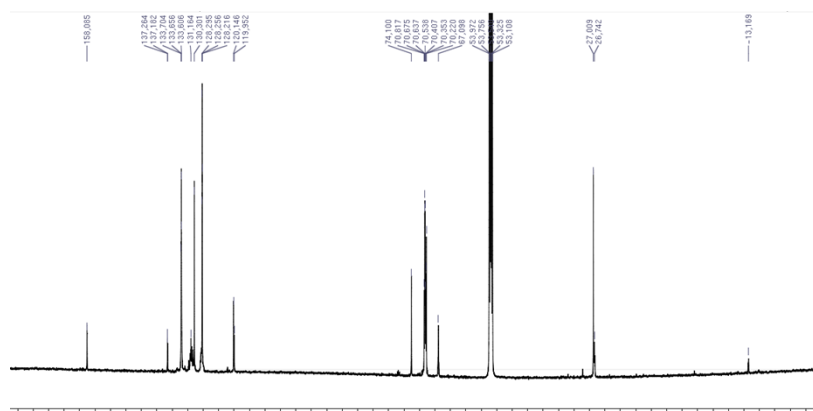

## ESI MS

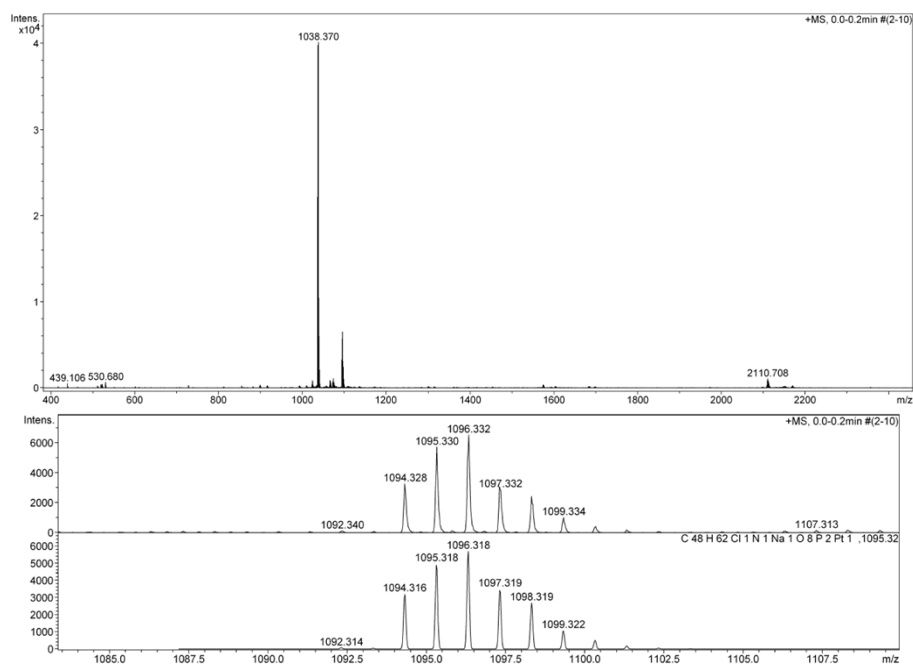

## Compound 9

$^1\text{H-NMR}$  ( $\text{CD}_2\text{Cl}_2$ , 298 K, 400 MHz)

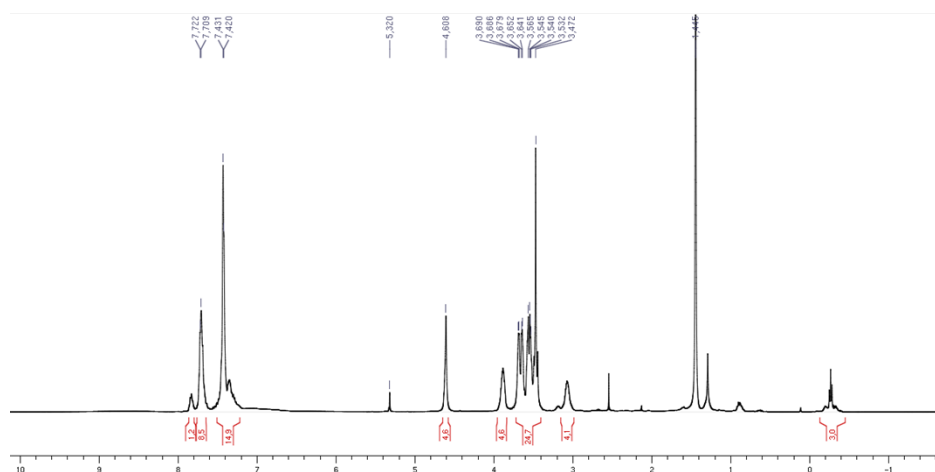

$^{13}\text{C-NMR}$  ( $\text{CD}_2\text{Cl}_2$ , 298 K, 125 MHz)

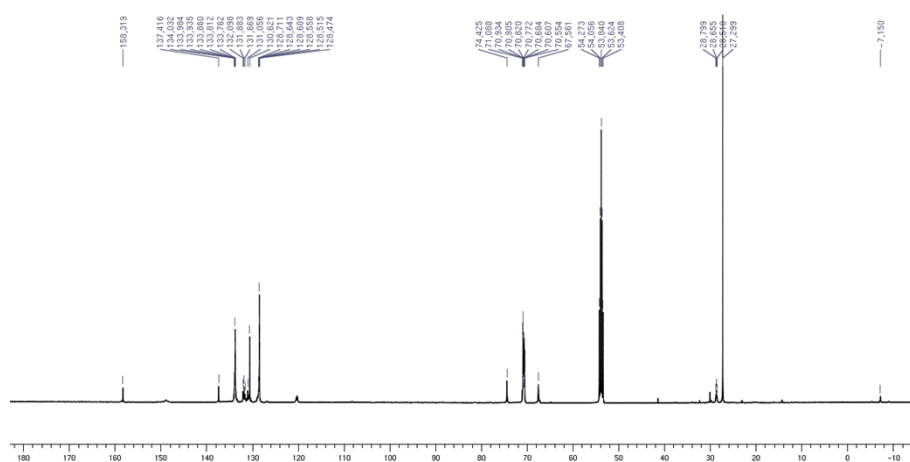

$^{31}\text{P-NMR}$  ( $\text{CD}_2\text{Cl}_2$ , 298 K, 162.0 MHz)

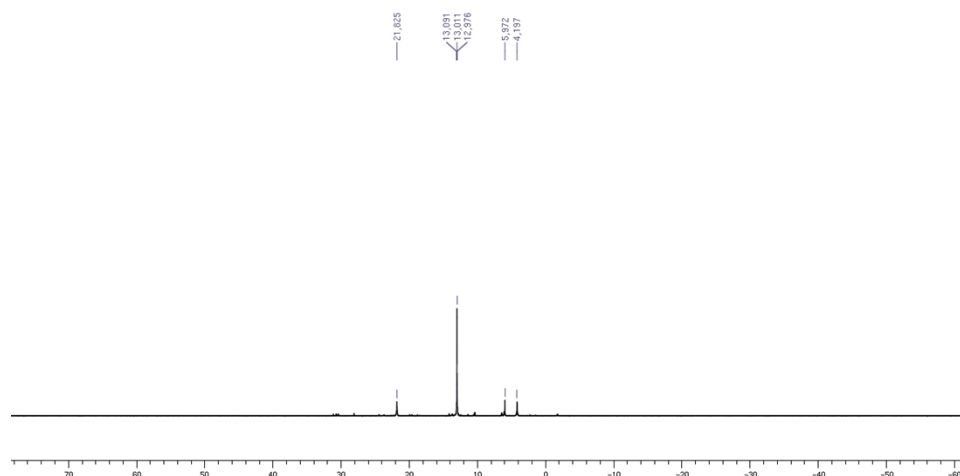

## ESI MS

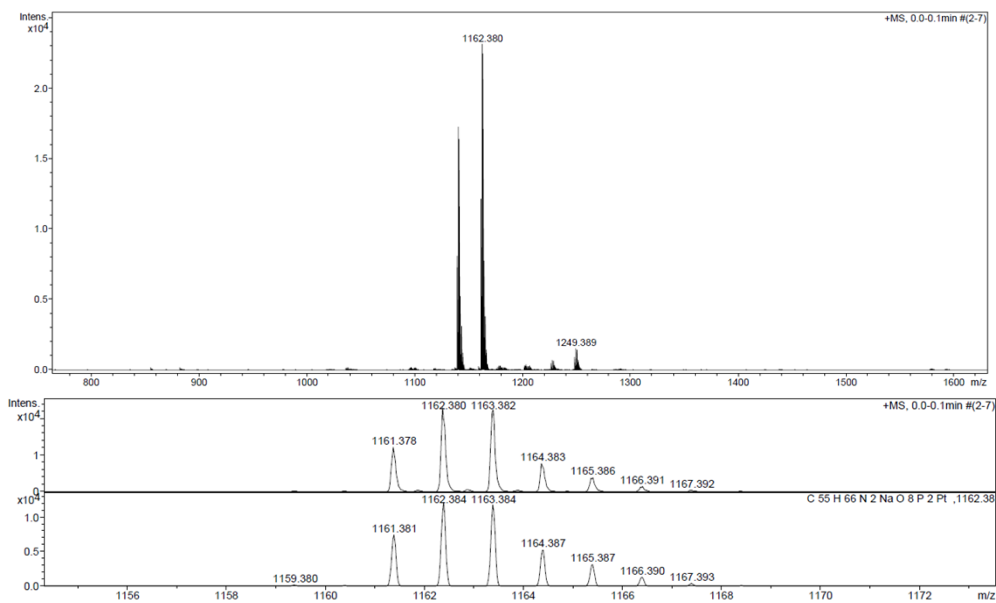

## Compound 11

### $^1\text{H-NMR}$ ( $\text{CDCl}_3$ , 298 K, 300 MHz)

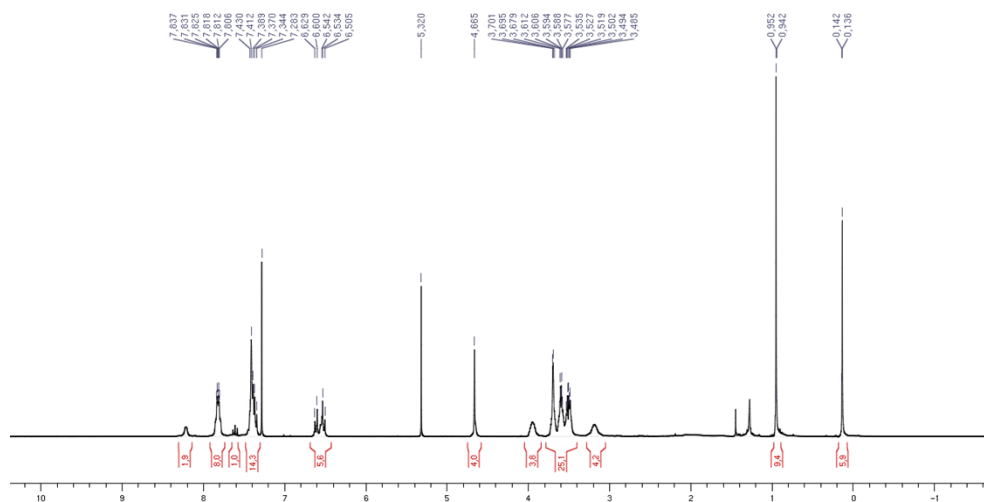

### $^{13}\text{C-NMR}$ ( $\text{CD}_2\text{Cl}_2$ , 298 K, 125 MHz)

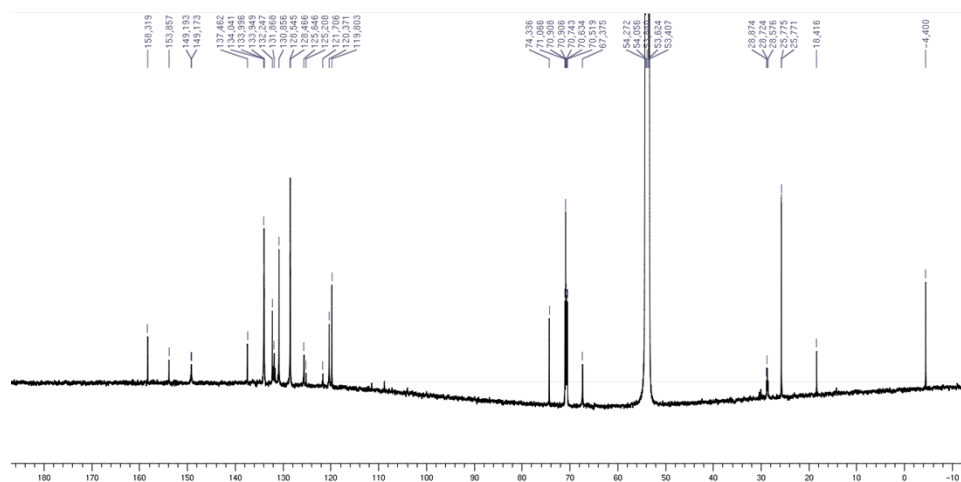

$^{31}\text{P}$ -NMR ( $\text{CDCl}_3$ , 298 K, 121.5 MHz)

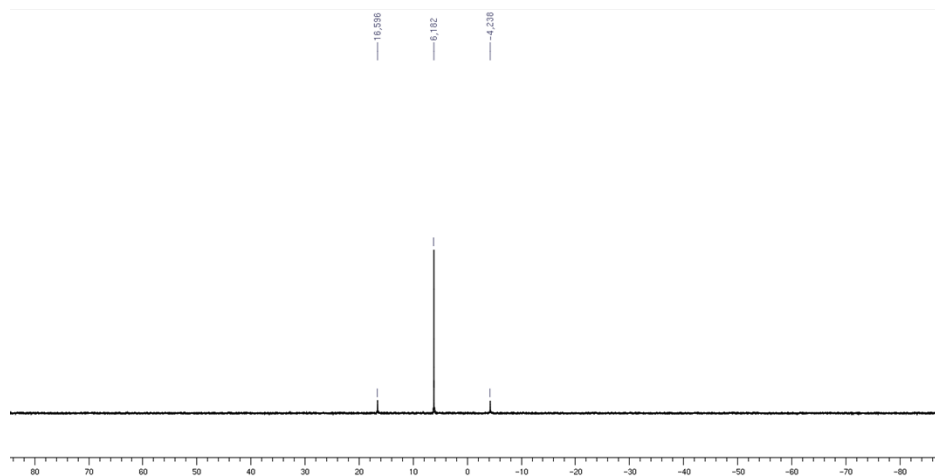

ESI MS

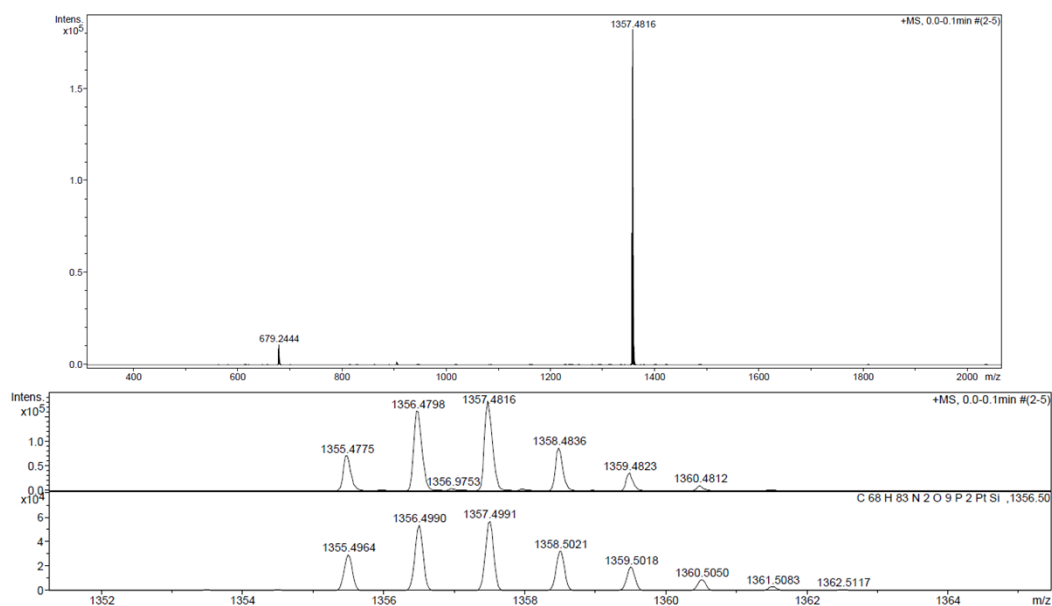

### III Titration – ESI-MS spectra of 1 + $n$ eq. of Ag(I)

1 + 1 eq. Ag<sup>+</sup>

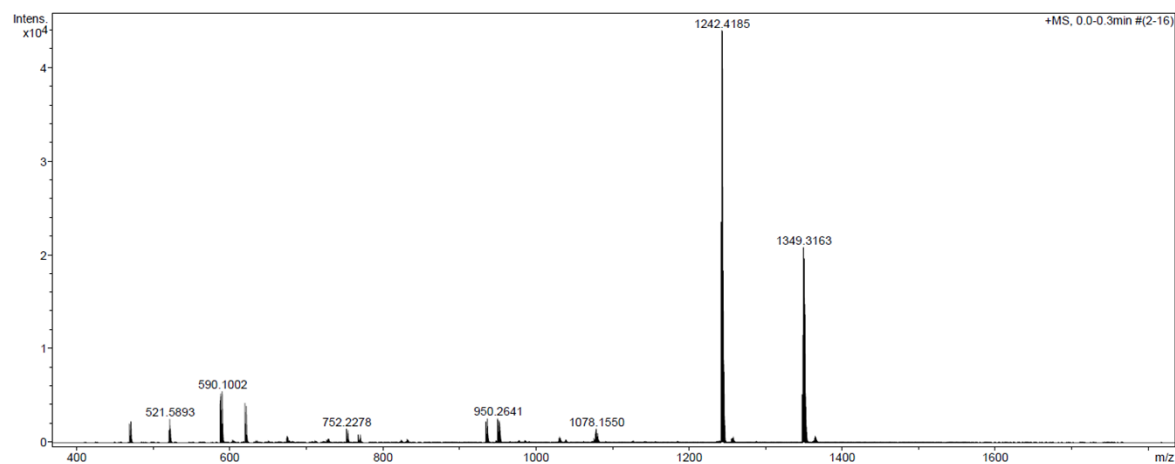

1 + 2 eq. Ag<sup>+</sup>

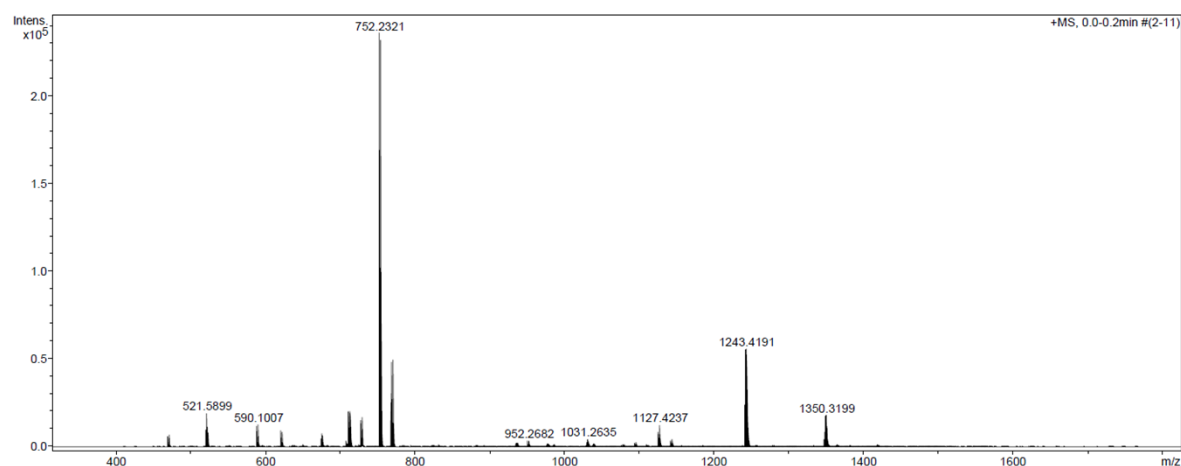

1 + 3 eq. Ag<sup>+</sup>

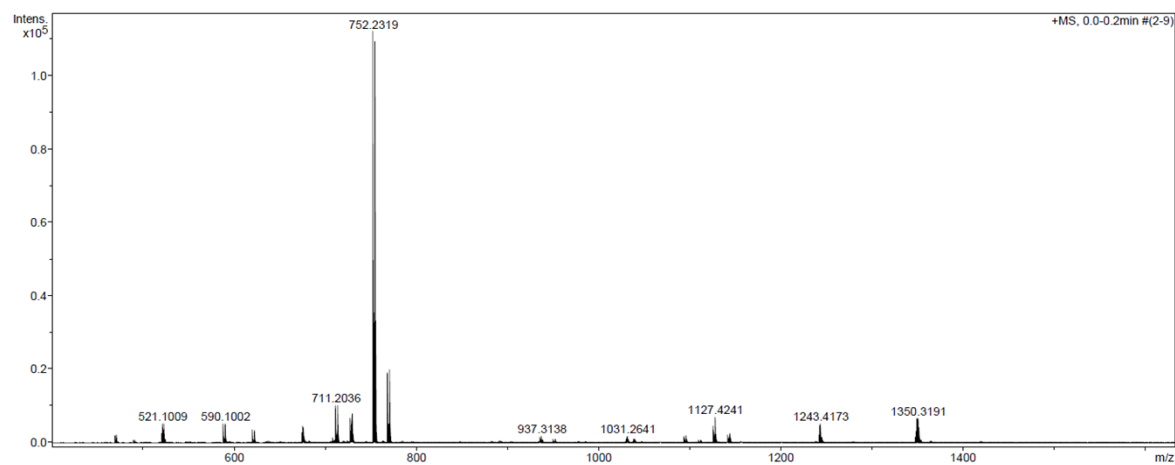

Supplement: c5cc04456a1.pdf [file c5cc04456a1.pdf]
